1        **The Challenge of Forecasting Demand of Medical Resources and Supplies**  
2        **During a Pandemic: A Comparative Evaluation of Three Surge Calculators**  
3        **for COVID-19**

4  
5        A.A. Kamar<sup>1#</sup>, N. Maalouf<sup>2#</sup>, E. Hitti<sup>3</sup>, G. El Eid<sup>3</sup>, H. Isma'eel<sup>1,4\*</sup>, and I. H. Elhajj <sup>1,2\*</sup>

6  
7        <sup>1</sup> Vascular Medicine Program, American University of Beirut, Beirut Lebanon

8        <sup>2</sup> Maroun Semaan Faculty of Engineering and Architecture, Department of Electrical and  
9        Computer Engineering, American University of Beirut, Beirut, Lebanon

10       <sup>3</sup> Department of Emergency Medicine, American University of Beirut Medical Center, Beirut,  
11       Lebanon

12       <sup>4</sup> Department of Internal Medicine, American University of Beirut Medical Center, Beirut,  
13       Lebanon

14  
15       \* Correspondence:

16       Dr. Hussain Isma'eel  
17       Department of Internal Medicine  
18       Faculty of Medicine  
19       American University of Beirut Medical Center, Beirut Lebanon  
20       P.O.Box: 11-0236  
21       Email: [hi09@aub.edu.lb](mailto:hi09@aub.edu.lb)

22  
23       Dr. Imad Elhajj  
24       Department of Electrical and Computer Engineering  
25       American University of Beirut, Beirut, Lebanon  
26       P.O.Box: 11-0236  
27       Email: [ie05@aub.edu.lb](mailto:ie05@aub.edu.lb)

28  
29       # These authors contributed equally to the work

30  
31       **Keywords:** COVID-19, Forecasting, Surge Calculator, PPE, Lebanon

32  
33       **Running Title:** COVID-19 Surge Forecasting Challenge

## 35 **Summary**

36 Ever since the World Health Organization (WHO) declared the new coronavirus disease 2019  
37 (COVID-19) as a pandemic, there has been a public health debate concerning medical resources  
38 and supplies including hospital beds, intensive care units (ICU), ventilators, and Protective  
39 Personal Equipment (PPE). Forecasting COVID-19 dissemination has played a key role in  
40 informing healthcare professionals and governments on how to manage overburdened healthcare  
41 systems. However, forecasting during the pandemic remained challenging and sometimes highly  
42 controversial. Here, we highlight this challenge by performing a comparative evaluation for the  
43 estimations obtained from three COVID-19 surge calculators under different social distancing  
44 approaches, taking Lebanon as a case study. Despite discrepancies in estimations, the three surge  
45 calculators used herein agree that there will be a relative shortage in the capacity of medical  
46 resources and a significant surge in PPE demand as the social distancing policy is removed. Our  
47 results underscore the importance of implementing containment interventions including social  
48 distancing in alleviating the demand for medical care during the COVID-19 pandemic in the  
49 absence of any medication or vaccine. It is said that “All models are wrong, but some are  
50 useful,” in this paper we highlight that it is even more useful to employ several models.

51

## 52 **Introduction**

53 The outbreak of the new coronavirus disease 2019 (COVID-19), caused by the severe acute  
54 respiratory syndrome coronavirus 2 (SARS-CoV-2), started in Wuhan City, China, and has  
55 rapidly spread all over the world. The newly identified coronavirus has 96% homology with the  
56 genetic sequence of  $\beta$ -coronaviruses; which include SARS-CoV and the Middle East respiratory  
57 syndrome CoV (MERS-CoV)<sup>1,2</sup>.. Despite similarities, SARS-CoV infection was limited to  
58 specific geographic areas, while COVID-19 has been declared as a global pandemic by the WHO  
59 on 11 March 2020. As of 17 September 2020, there are 29,737,453 COVID-19 confirmed cases,  
60 937,391 deaths, and around 213 countries or territories affected with cases around the world<sup>3</sup>.

61 COVID-19 has not only caused mortality but has put tremendous pressure on healthcare systems  
62 and led to shortages in Personal Protective Equipment (PPE) <sup>4,5</sup>. In the Middle East and North  
63 Africa Region (MENA) countries including Lebanon, the COVID-19 pandemic is leading to a  
64 health crisis and worsening the spike in demand on healthcare resources and supplies <sup>6</sup>. To monitor  
65 the strain on healthcare systems in each country, it is essential to closely follow the demand for  
66 hospital beds, intensive care unit (ICU) beds, and ventilators <sup>7</sup>. Therefore, a growing number of  
67 models have been established around the world to aid in forecasting COVID-19 deaths, cases, and  
68 the demand for medical supply (including ventilators, hospital beds, and ICU beds, the timing of  
69 patient surges, and more)<sup>8-10</sup>. While simple models apply the user's inputs on the local population  
70 and current status of COVID-19, more sophisticated models permit the user to modify other  
71 parameters (e.g., social distancing changes) that affect the trends. Some of the models match  
72 projected cases to existing capacity to project when and where a caseload surge will surpass  
73 capacity<sup>11</sup>. Data-driven modeling approaches have also appeared for the COVID-19 pandemic, in  
74 which statistical and machine learning models are used for projecting cases, hospitalization,

75 deaths, and the impact of social distancing<sup>12</sup> Unfortunately, forecasting what is most likely to occur  
76 in the upcoming weeks during the COVID-19 pandemic is not available for all countries including  
77 some European countries or few states in the USA<sup>8</sup>. Where available, different models are  
78 providing widely varying numbers of needed medical resources and/or supplies which often lead  
79 to an incorrect distribution of what is available due to inconsistency in numbers. For example, the  
80 Centers for Disease Control and Prevention has reported that COVID-19 outbreaks in parts of the  
81 USA have resulted in surges in hospitalizations and ICU patients<sup>13</sup>. However, providing accurate  
82 predictions of the healthcare system capacity peak demand is controversial due to the scarcity  
83 and/or unreliability of data in addition to challenges associated with forecasting the effects of the  
84 rapid changes in mitigation policies<sup>14</sup>. So far, the efforts to accurately model any emerging  
85 outbreak's trajectory for the upcoming days are limited due to variabilities in assumptions and  
86 parameters including social distancing<sup>14-16</sup>. Accordingly, the use of a single forecasting model  
87 may not precisely predict how the pandemic evolves<sup>17</sup>.

88 Regardless of all the challenges, COVID-19 has put forecasting at the top of global public  
89 policymaking and developing effective preventive strategies<sup>18,19</sup>. Since there is no "gold standard"  
90 for predicting thresholds, the reasonable evaluation of the outputs of various forecasting models  
91 has remained an open question<sup>20</sup>. In this work, we highlight this challenge by comparing the  
92 projected demand for medical resources and supplies from three surge calculators for COVID-19  
93 taking Lebanon as our case study. To this end, we adapted an available statistical model for  
94 estimating the daily impact of COVID-19 on hospital services based on the COVID-19 Hospital  
95 Impact Model for Epidemics (CHIME). The model was modified to incorporate longer projection  
96 periods and different social distancing policies (%). We then compared the hospital beds, ICU  
97 beds, and PPE demand over 200 days projected by the three surge calculators a) CHIME PPE

98 calculator, b) WHO COVID-19 Essential Supplies Forecasting Tool (COVID-19 ESFT) and c)  
99 our own developed American University of Beirut Medical Center (COVID-19 AUBMC Surge  
100 needs) calculator. The results of these calculators differ depending on the parameters and  
101 assumptions implemented within to generate the forecasted data. Despite the discrepancies in  
102 estimations, the three surge calculators used herein consistently agree on trends demonstrating that  
103 social distancing policy can help reduce the demand for medical resources and supplies amid the  
104 COVID-19 pandemic.

## 105 **Methods**

### 106 **Data collection**

#### 107 *Case counts, population and hospital capacity data*

108 We used the WHO and the Lebanese Ministry of Public Health (MoPH) websites to identify data  
109 on the estimated Lebanese population in 2020 (6,825,000) and confirmed COVID-19 infected  
110 individuals and death cases respectively. Data on inpatient beds, ICU capacity, and mechanical  
111 ventilators were obtained from the Lebanese MoPH website (Table 1). The data for the COVID-  
112 19 AUBMC calculator regarding PPE demand were collected based on historical and current data  
113 estimates from the American University of Beirut Medical Center (AUBMC), presuming these  
114 data as a nationwide reference. In most of the calculations, numbers derived from Lebanon were  
115 used where available.

### 116 **Statistical Input parameters**

#### 117 *CHIME Model and modifications*

118 Our estimations were based on the CHIME model that was initially developed by the Predictive  
119 Health at Penn Medicine in the USA<sup>21</sup>, which permits healthcare systems to enter data about their  
120 population and modify the assumptions about the COVID-19 spread and behavior<sup>21</sup>. The tool runs  
121 a modified Susceptible-Infected-Recovered (SIR) model, a traditional epidemiological forecasting  
122 technique, to estimate the number of new COVID-19 hospital admissions per day. The SIR model  
123 calculates the theoretical number of people infected with an infectious disease over a period of  
124 time in a closed population with the Kermack-McKendrick model being the simplest of all SIR  
125 models<sup>22,23</sup>. The CHIME model was built to help hospital systems to accurately project the needed  
126 resources during the COVID-19 pandemic, mainly hospital beds, ICU beds, and ventilators<sup>24</sup>. The  
127 model accounts for four main parameter categories: 1) the hospital parameters, 2) spread and  
128 contact parameter, 3) severity parameters, and 4) display parameters. The model allows integrating  
129 some information about social distancing policies that are emplaced by governments<sup>24</sup>.  
130 In this study, we have introduced some modifications to the CHIME application to make it  
131 compatible with the input parameters available for the projections in Lebanon.

132 The modifications were twofold:

133 *1. Automate the data projection process:*

134 The application was updated allowing the user to enter the input parameters into an “Excel  
135 workbook” and obtain the generated census compiled together in the same workbook. This  
136 alleviates the data processing part where the user needs to obtain each projection separately. It also  
137 enables faster simulations for different input parameters and most importantly different social  
138 distancing measures (Table 2).

139 *2. Allow projections over a longer period:*

140 The application initially allowed for a maximum 30-day projection period. Our contribution  
141 enables for longer periods such as 200 days, as seen herein. This provides analysts and healthcare  
142 workers with longer forecasts, thus giving them more time to prepare for periods of peak demand.  
143 The CHIME projects the daily and cumulative number hospitalized, ICU, ventilated, and newly  
144 admitted COVID-19 cases, with social distancing policy percentage being the variable.

145 *3. Provide simultaneous known cases (per day) as output*

146 The modification allows us to study the number of daily infected individuals after deducting the  
147 number of recovered cases. The number reflects the confirmed cases and does not consider  
148 possible infected individuals that are not confirmed yet. The aim behind this modification is to  
149 provide these numbers as inputs to the calculators, especially COVID-19 AUBMC and WHO  
150 COVID-19 ESFT calculators.

151

152 Our projections were based on three social distancing policy scenarios (0%, 30%, and 50%)  
153 based on the National Health Strategic Preparedness and Response Plan for COVID-19  
154 pandemic lock-down management and exit strategy implemented by the Lebanese Government <sup>6</sup>.  
155 We also simulated the strict social distancing policy (92%) based on the Wuhan-style  
156 containment <sup>25</sup>. The latter was performed to assess how strict “lock-down” could help better  
157 contain the COVID-19 outbreak and maintain the demand for hospital beds, ICU beds,  
158 ventilators, and PPE. Although Lebanon started re-opening gradually with limited capacity as of  
159 May 4, 2020, the country went again into a complete four-day lockdown starting May 14.  
160 Therefore, we ran our estimations on May 14, 2020 (Day 0) assuming the four social distancing  
161 policy scenarios. The other social distancing policy scenarios and the mitigation dates below

162 were chosen as the per five-step re-opening plan implemented by the Lebanese Government <sup>6</sup>  
163 (Table 2).

#### 164 **PPE calculators**

165 We have used the WHO COVID-19 ESFT calculator (WHO 2020a) and the COVID-19  
166 AUBMC surge Needs calculator, to estimate daily and total hospital beds, ICU beds, ventilators,  
167 and PPE demand. Results obtained from the CHIME PPE calculator were then compared to  
168 those derived from the WHO COVID-19 ESFT and COVID-19 AUBMC calculators. As the  
169 COVID-19 AUBMC calculator was developed by our team, we chose the CHIME PPE  
170 calculator because it is compatible with the CHIME model, and the WHO COVID-19 ESFT  
171 calculator because it is widely used as a worldwide reference to estimate medical resources and  
172 supplies to respond to the current COVID-19 pandemic. Also, the CHIME and COVID-19 ESFT  
173 calculators are freely available online for use by governments, stakeholders, and healthcare  
174 centers.

#### 175 *The CHIME PPE calculator*

176 The CHIME PPE calculator was generated to work in parallel with CHIME-generated  
177 projections. The calculator uses forecasted patient censuses to output daily and cumulative  
178 projections for each type of PPE (including N95 masks, surgical masks, gloves, gown, and eye  
179 disposable protection) quantities per day, and computes the cumulative PPE predictions <sup>26</sup>. This  
180 tool also permits users to input their custom scenarios (standard, crisis, contingency, and  
181 custom), tailored to the specific situations relevant to their hospital or healthcare system <sup>26</sup>. In  
182 our study, we chose the values for the standard scenario assuming we do not have exact publicly  
183 available data estimates of the exact number of staff and HCW (healthcare workers) in Lebanon.



184 As social distancing policies and gradual lifting of restrictions are always the keep factors being  
185 debated in the intervention strategies, our estimations were based on the four social distancing  
186 policy scenarios mentioned above (Table 2). For each scenario, the projected hospitalized, ICU,  
187 and ventilated censuses are inserted into the CHIME PPE calculator in addition to the daily  
188 admissions. This data is obtained from the Penn CHIME application model. Based on the  
189 provided data the calculator outputs the PPE predictions per day in addition to the total  
190 cumulative predictions over the chosen period of 200 days. Since other calculators do not  
191 forecast the daily PPE demand, we compared the average daily PPE demand from this calculator  
192 with the predictions of other calculators.

### 193 *WHO COVID-19 ESTF Calculator*

194 The 2020 WHO COVID-19 ESTF calculator is developed to aid countries in estimating potential  
195 needs and supplies to respond to the COVID-19 pandemic <sup>27</sup>. The tool is not meant to be used as  
196 an epidemiological model, yet it has simple exponential growth and Susceptible-Infectious-  
197 Removed (SIR) case forecast options built-in <sup>28</sup>. The calculator is a supply forecasting tool that  
198 helps in estimating potential requirements for essential supplies including PPE (e.g. surgical  
199 masks, gloves, gowns, goggles, respirators, and face shields), biomedical equipment for case  
200 management (e.g. mechanical ventilators and oxygen concentrators), drugs for supportive  
201 treatment, hygiene, and IPC commodities, diagnostics, and consumable medical supplies. The  
202 calculator also estimates the weekly number of COVID-19 patients classified according to  
203 severity as follows: mild, moderate, severe, and critical. Severe and critical cases are admitted to  
204 ICU and require oxygen and ventilation respectively. Inpatient beds in this calculator refer to  
205 ICU beds occupied by the critical and severe COVID-19 cases per week and not day. Therefore,  
206 the estimated peak for inpatient and ICU beds will be the same throughout the chosen period.

207 Although the tool is suited for projections over a short period (12 weeks), it offers an option to  
208 enter data manually and make projections over longer periods. COVID-19-ESFT does not  
209 quantify or account for resources already available locally or those pending delivery. The  
210 calculator projects the PPE quantity per person per day for inpatient care, cases in isolation,  
211 screening, and laboratory, and the total daily costs (USD) of items over 28 weeks. Then, it adds  
212 the total quantity for each per day. In this study, we use the default input parameters set by the  
213 WHO COVID-19 ESFT calculator for Lebanon, including the population estimate, patients case  
214 sensitivity, healthcare workers, and staff. To maintain consistency across the different  
215 calculators, we manually input the cumulative projected COVID-19 cases as obtained from the  
216 CHIME model application. The data is compiled in a weekly form (up to 28 weeks) to be  
217 compatible with the COVID-19 ESTF calculator. This approach guarantees that all calculators  
218 are using the same numbers for infections and the focus would be on the  
219 discrepancies/agreements between the models on the estimates of resource demand.

#### 220 *The COVID-19 AUBMC surge needs calculator*

221 The AUBMC calculator (<https://www.aub.edu.lb/fm/vmp/Pages/calculators.aspx>) was developed  
222 by our team based on AUBMC and MoPH data and is implemented as an excel file that predicts  
223 the average total of PPE needs (e.g., gloves, surgical face masks, face shields, and N95 masks)  
224 per day. The estimations are based on the average number of patients admitted and tested  
225 individuals per day using actual PPE demand data collected from AUBMC. Note that we assume  
226 AUBMC policies of PPE use (such as wearing surgical masks over N95 masks, replacing  
227 surgical masks per patient, and replacing N95 masks per shift) are representative of policies at  
228 the national level. The average number of admitted patients is calculated from the Penn CHIME  
229 model application projections over the whole pandemic period (200 days) using the

230 hospitalization percentage of simultaneously infected individuals. The average number of tested  
231 individuals is calculated by dividing the total number of tests done as indicated in  
232 (<https://www.worldometers.info/coronavirus/?#countries>) by the number of pandemic days. The  
233 PPE estimations in this calculator are based on average values as compared to daily/weekly  
234 projections used in the other two calculators. This calculator also projects the total number of  
235 ventilators, hospital beds, and ICU beds occupied during the COVID-19 pandemic using the  
236 same inputs of the CHIME application. The beds and ventilators calculations are designed to  
237 estimate the availability during peak periods of the pandemic. The calculator takes as input the  
238 currently available ventilators and beds dedicated to COVID-19 patients as declared by MoPH in  
239 addition to the peak simultaneous infections and admissions as projected by the Penn CHIME  
240 model application. This information helps in forecasting possible shortages in beds or ventilators  
241 and the dates when these shortages would occur (Table 3).

242

## 243 **Results**

244 Based on MoPH data, from March 29, 2020, Lebanon is estimated to have 2308 ICU beds and  
245 11794 inpatient (hospital) beds. We assume that 32 % of ICU beds and 20% of hospital beds at  
246 the national level are currently occupied by non-COVID-19 patients (Table 4). However, this  
247 occupancy number is, in reality, higher due to the casualties from the devastating port explosion  
248 in Beirut on August 4, 2020. Also, there has been a surge in cases nationally. One reason behind  
249 this surge is that many people have been unable to follow precautionary measures, such as social  
250 distancing, during the relief efforts in Beirut. Also, some of the major hospitals have been  
251 partially or heavily damaged as a result of the huge blast at Beirut's port. MoPH reported that  
252 almost all COVID-19 beds are full and hospitals are running out of space for new patients by the  
253 time of writing this work. This incident highlights the challenge of planning during a pandemic,  
254 particularly when coupled with unexpected disasters.

255 In one scenario and based on our data, assuming strict social distancing policy or the Wuhan-  
256 style (92%), the modified CHIME model estimates that out of the remaining 9435 hospital beds,  
257 a peak of 67 inpatient beds is needed by the COVID-19 cases or 0.7 % of the available hospital  
258 beds. Of the remaining available 1569 ICU beds and 687 ventilators, the model estimates a peak  
259 of 15 (1%) ICU beds, and 10 ventilators (1.5%) are needed by COVID-19 patients respectively,  
260 with a decreasing pattern in the estimated COVID-19 infected patients over the projected period.

261 Assuming the same scenario, the COVID-19 ESFT calculator estimates a weekly peak of 11  
262 inpatient beds (0.1%), 17 ICU beds (1.1%), and 9 ventilators (1.3%) are occupied. The COVID-  
263 19 AUBMC calculator estimates a different peak of 71 inpatient beds (0.8%), 18 ICU beds  
264 (1.1%), and 11 ventilators (1.6 %) (Figs. 1.A, 2, and 3). Upon relaxing social distancing  
265 measures to 50 %, the CHIME model estimates the same peak capacity for the available inpatient

266 beds, ICU beds, and ventilators. Still, the COVID-19 AUBMC calculator differentially estimates  
267 that the peak of daily occupied inpatient beds increases to 94 (1%), while ICU beds and  
268 ventilators increase to 23, representing 1.47% and 3.35% of the available ICU beds and  
269 ventilators respectively. On the other hand, the COVID-19 ESFT estimates an increase in the  
270 weekly peak demand of inpatient bed capacity to 1279 (13.75%), the ICU beds to 58 (3.7%), and  
271 the ventilators to 16 (1.31%) (Figs. 1.B, 2, and 3).

272 When the social distancing policy is reduced to 30 %, all the surge calculators variably show that  
273 the capacity of the daily peak of hospital beds and ventilators occupied by COVID-19 patients  
274 significantly increases. The CHIME estimates a daily peak of 4016 inpatient beds (43%), 912  
275 ICU beds (58%), and 602 ventilators (88%) to be occupied. With a higher occupancy rate, the  
276 COVID-19 AUBMC calculator estimates a peak of 4896 inpatient beds (52%), 1224 ICU beds  
277 (78%), and 1224 ventilators. The latter indicates a shortage of 537 ventilators for COVID-19  
278 patients in this scenario. On the contrary, the ESFT calculator estimates a marked increase in the  
279 weekly peak of inpatient beds (2665) and ventilators (266) but a shortage of 1096 ICU beds  
280 (Figs. 1.C, 2, and 3). To evaluate to which extent removing social distancing practices strain  
281 hospital capacity, we ran our estimations assuming 0 % social distancing. Our results show that  
282 in addition to the variability in projections, all calculators estimated that there will be a shortage  
283 in inpatient and ICU bed capacity during the 200 days. Yet, only ESFT calculator estimates that  
284 ventilators available can accommodate the critical COVID-19 patients needing ventilation. The  
285 CHIME model estimates that the daily peak capacity significantly increases to 113356 inpatient  
286 beds, 25528 ICU beds, and 17003 ventilators. Similarly, this increase was marked by the  
287 COVID-19 AUBMC calculator that estimated a peak daily capacity of 124658 inpatient beds,

288 33696 ICU beds, and 36834 ventilators. The ESFT calculator forecasted a daily peak capacity of  
289 11876 inpatient beds, 11876 ICU beds, and 657 ventilators (Figs. 1.D, 2, and 3).

290 We also compared the projected demand for different PPE types (including N95, surgical masks,  
291 gloves, gowns, disposable eye protection/goggles, and face shield) by the three surge calculators  
292 over 200 days assuming the same social distancing policy scenarios (%). The CHIME calculator  
293 estimates a minimum average daily demand of various PPE types when Wuhan style (92%)  
294 policy is applied. The projected outputs include an average daily demand of 689 N95 masks,  
295 1239 surgical masks, and 13086 gloves, gowns, and disposable eye protection. When compared  
296 to the CHIME projections, the COVID-19 AUBMC calculator estimates a slightly more daily  
297 average demand of 817 N95 masks, however, it estimates an average daily peak demand of  
298 11516 surgical masks, 57842 gloves, and 11811 gowns, and 11429 face shields. Interestingly, the  
299 ESFT calculator estimates a significantly higher average daily demand values for all PPE types.  
300 The estimated average daily demand includes 75082 surgical masks, 159488 gloves, 42331  
301 gowns, 36941 goggles, and 160 face shields (Fig.4A). The estimated average daily demand for  
302 gloves in the ESFT calculator refers to the sum of gloves used for surgery, examination, and  
303 heavy-duty. When social distancing policy changes to 50%, the forecasted average daily demand  
304 for all PPE types increases gradually to 12023 N95 masks, 216411 surgical masks, 228434  
305 gloves, gowns, and disposable eye protection. This increase in the projected average daily PPE  
306 demand was also observed with the COVID-19 AUBMC and ESFT calculators. The COVID-19  
307 AUBMC estimates 883 N95 masks, 13201 surgical masks, 72317 gloves, 14274 gowns, and  
308 11796 face shields. The ESFT estimates an average daily demand of 269432 surgical masks,  
309 926610 gloves, 78503 gowns, 71158 goggles, and 280 face shields (Fig. 4B). The projected  
310 average daily demand for all PPE types by the three surge calculators was still revealing a spike

311 in values with the 30 % social distancing policy. The CHIME calculated a total average daily  
312 demand of 84761 N95 masks, 1525695 surgical masks, 1610456 gloves, 1610456 gowns, and  
313 1610456 disposable eye protection. AUBMC estimates 1716 N95 masks, 34705 surgical masks,  
314 257035 gloves, 45709 gowns, and 16472 face shields. A significant surge in the average daily  
315 demand was also obtained with the COVID-19 ESFT calculator with an estimation of 2786405  
316 surgical masks, 210525007 gloves, 535175 gowns, 510030 goggles, and 8201 face shields (Fig.  
317 4C). On the other hand, the variability in projections was more emphasized when we applied the  
318 0% social distancing policy. The CHIME projected estimated an average daily demand of  
319 2701804 N95, 48632478 surgical masks, and 51334282 for gloves, gowns, and disposable eye  
320 protection. AUBMC estimated an average daily demand of 34517 N95 masks, 881405 surgical  
321 masks, 7530079 gloves, 1283394 gowns, and 200594 face shields. This trend was also obtained  
322 with COVID-19 ESFT, estimating an average daily need of 26385273 surgical masks, 45233595  
323 gloves, 1982045gowns, 1248759 goggles, and 15433 face shields (Fig.4D).

324 We then compared the change in the forecasted PPE fold-demand from other scenarios with the  
325 Wuhan Style scenario (92%) since we have the least contact rate, minimum COVID-19 cases,  
326 and minimal projected hospital utilization and PPE demands. So, when we changed social policy  
327 to 50%, the CHIME estimated an average of a 17-fold increase in the daily demand for all the  
328 PPE types. However, the COVID-19 AUBMC and ESFT reveal a minimum of a 1- and 4-fold  
329 increase in the average PPE demand per day. This difference in PPE demand projections  
330 becomes more apparent as social distancing policy decreases to 30% where the ESFT and the  
331 CHIME estimate up to 46 and 100-fold increase in the average daily demand for all PPE types  
332 respectively. Although the COVID-19 AUBMC calculator projected a substantial increase in the  
333 average daily demand for all PPE types, this pattern in fold increase was not observed. The

334 calculator, however, estimates only a 4-fold increase in the average daily demand for all PPE  
335 types. The difference in estimations was more obvious with the relaxed social distancing  
336 scenario (0%). While the CHIME estimates a significant increase in the average daily demand to  
337 3000 folds for all PPE types, the COVID-19 AUBMC and ESFT forecast of around 100- and  
338 200-fold increase in the average daily demand for all PPE types respectively (Fig. 5).

## 339 **Discussion**

340 As the first wave of the COVID-19 pandemic sweeps across the Middle East and the world, with  
341 evidence of a second wave emerging in some countries, the strain placed on the health system  
342 services including hospital beds, ICU beds, and ventilators continues to escalate. To support the  
343 preparedness for a pandemic outbreak, the capability to forecast the potential spread of a disease  
344 is an utmost need for applying public health interventions and effectively allocating resources<sup>29</sup>.  
345 Particularly, this is critical for low- and middle-income countries, as they often unevenly bear the  
346 infectious diseases burden and are hindered by limitations in resources available to tackle them  
347 <sup>29</sup>, often relying heavily on an increasingly restricted foreign supply-chain. Despite the efficacy  
348 of forecasting in the better planning ahead and reducing the impact of the infectious disease  
349 outbreaks including healthcare capacity, deaths, and the economic burden experienced,  
350 comparing forecasts at the national level remains challenging <sup>17,29,30</sup>. The latter can potentially  
351 limit the development and use of forecasting <sup>17</sup>.

352 In this study, we highlight this challenge by comparing the projected incremental demands of  
353 medical resources and supplies by three surge calculators (CHIME, WHO COVID-19 ESFT, and  
354 COVID-19 AUBMC) for a single 200-day COVID-19 wave taking Lebanon as our case study;  
355 assuming different social distancing policy scenarios. Our results indicate that there is a  
356 discrepancy in the forecasted data between the three surge calculators despite the use of identical



357 input data. Yet, the three surge calculators used consistently show that relaxing social distancing  
358 policy and mitigation measures can dramatically overwhelm hospital capacity and lead to a  
359 dramatic surge in the daily PPE demands during the COVID-19 pandemic. These results are  
360 congruent with recommendations for implementing initiatives to “flatten the curve” and avoid  
361 healthcare systems from being overwhelmed through the exponential growth of the disease<sup>31</sup> .  
362 Since prompting social distancing policy measures have helped in reducing the pandemic’s  
363 spread as shown by COVID-19 mathematical models <sup>32,33</sup>, our comparison was more based on  
364 testing the efficacy of this approach on the healthcare infrastructure capacity and PPE demand  
365 using the three aforementioned surge calculators.

366 When assuming the strict social distancing measures (Wuhan-style), the three surge calculators  
367 projected an unpronounced daily demand for hospital beds, ventilators, and PPE during the  
368 pandemic. The variability in estimations between the calculators revealed the least margins of  
369 error given this scenario. When relaxing the social distancing measures to 50%, the calculators  
370 forecasted that the available hospital beds, ICU beds, and ventilators are enough to accommodate  
371 the projected COVID-19 cases, yet with a very noticeable increase in the average daily PPE  
372 demand. By decreasing the social distancing policy to 30%, the calculators estimate that there is  
373 a substantial surge in the demand for PPE and hospital utilization. At this stage, the difference  
374 becomes more apparent between the forecasted data. However, when the simulated social  
375 distancing measures are completely removed, all calculators show to some extent that the  
376 COVID-19 pandemic will put unprecedented strain on inpatient beds, ICU beds, ventilators, and  
377 there will be a drastic increase in the average daily PPE demands. This underscores the urgency  
378 of implementing social distancing to help in limiting COVID-19 community transmission by  
379 reducing the circle of social contacts and the contact rate <sup>34</sup>. Our results are similar to those of the

380 IHME team and Murray who forecasted that the healthcare system's capacity will be stressed in  
381 the USA and Europe during the COVID-19 pandemic and proposed some measures to increase  
382 the supply of key products and services<sup>8,9</sup>. Interestingly, our data indicate that the output  
383 predictions of all used surge calculators vary very widely upon relaxing the social distancing  
384 policy measures leading to a rise in the margins of agreement.

385 The discrepancy in the obtained results could be related to several reasons. For PPE, some of the  
386 items are subdivided into different categories such as the types of gloves, gowns, and masks used  
387 by patients and staff as in the WHO COVID-19 ESFT calculator. Also, the ESFT calculator  
388 gives a more detailed quantification for PPE, for example, the estimation for gloves refers to the  
389 sum of those used for surgery, examination, and heavy duties. In the CHIME and COVID-19  
390 AUBMC calculators, some of these categories are missing, which indicates that the PPE types  
391 are not being included in the calculated demand. In the COVID-19 AUBMC calculator, the N95  
392 masks are considered to be used only in intubations. However, the ESFT calculator does not  
393 even give estimates for N95 masks. Moreover, the CHIME and ESFT calculators include PPE  
394 needs for testing staff and HCW, which adds to the demand in its estimations. Considering the  
395 need for PPE in healthcare departments related to non- COVID-19 patients and used for  
396 additional precaution could also increase the calculated demand. Varying results across the three  
397 calculators are also evident in the inpatient beds, ICU beds, and ventilators needed during the  
398 peak demand period. This can be related to the way each calculator assesses the severity of the  
399 cases. According to the COVID-19 AUBMC calculator, each ICU patient is assumed to require  
400 ventilation. However, the WHO ESFT calculator assumes that only severe and critical COVID-  
401 19 cases are admitted to the hospital and assumes that only the critical cases in ICU require  
402 ventilation, while the rest need oxygen tubes. As for the CHIME, it classifies the hospital

403 admitted COVID-19 into three categories including hospitalized, ICU, and ventilated. Since  
404 there is no absolute truth that we can compare to assess the accuracy, we only resort to the  
405 relative comparison. Nevertheless, this wide variability in estimations can add more uncertainty  
406 to the forecasted hospital utilization and PPE demand and highlights the importance of  
407 maintaining social distancing in the absence of pharmaceutical intervention for COVID-19. To  
408 be able to evaluate the surge calculators objectively, the results produced should be compared  
409 with their real known values. However, parameters used in models for forecasting the  
410 dissemination of infectious diseases are prone to uncertainties and limitations<sup>29</sup>. Besides,  
411 enhancing the current model forecasting abilities is directly proportional to the accuracy of the  
412 data provided<sup>29</sup>. In our case, we input the cumulative projected COVID-19 cases as obtained  
413 from the modified CHIME model application into all calculators to maintain consistency. Yet, in  
414 addition to using already built models, we still lack accuracy as we do not have tangible data in  
415 Lebanon on PPE consumption and the capacity of healthcare system infrastructure. Also, we are  
416 not very sure how much our input data are up-to-date and reliable especially that the healthcare  
417 capacity is subjected to change throughout an outbreak<sup>29</sup>.

418 The results of this study were based on showing the differences in estimations done by three  
419 surge calculators for COVID-19 and a modified version of the CHIME model to measure needs  
420 for different health system resources based on the total of predicted simultaneously active cases.  
421 These calculations were carried out based on three important assets receiving significant  
422 attention worldwide: inpatient beds, ICU beds, ventilators, and PPE<sup>35,36</sup>. Other items and human  
423 resources required in the diagnostic and treatment chain can be forecasted including staff and  
424 HCW in the frontline of COVID-19 response, and therapeutics for supportive treatment. We  
425 believe that one of the major limitations for forecasting COVID-19 is based on the limited

426 evidence since neither the magnitude nor duration of the COVID-19 wave is known with  
427 certainty. Another limitation is that we did not factor in PPE re-use measures such as sterilization  
428 of used N95 masks. Therefore, the adequate management of medical resources (including PPE,  
429 beds, ventilators, and health care providers) is highly recommended at this stage as some  
430 countries have started to experience a resurgence of COVID-19 cases as the pandemic continues  
431 to accelerate. Experience from several countries including China, South Korea, and Singapore in  
432 addition to mathematical modeling has revealed that the pandemic can be contained even in the  
433 exponential growth phase using a combination of interventions<sup>34,37</sup>. The latter mainly includes  
434 social and physical distancing, public awareness, and wearing masks<sup>34</sup>.

435 In conclusion, the surge calculators used here, regardless of the variability in outputs, can be  
436 powerful tools for measuring the impact of social distancing policy through highlighting the  
437 dangers of scaling down non-pharmaceutical public and social health measures in the absence of  
438 any vaccine or therapy against COVID-19. Characterizing forecasting uncertainty can be  
439 improved by some promising avenues including methodological advances in model comparison  
440 and averaging<sup>29</sup>. Therefore, the use of more than one model is recommended to generate more  
441 accurate and better predictions of the pandemic's evolution<sup>38</sup>. In other words, policymakers can  
442 use these calculators interconnected with each other based on the available data for each country  
443 to understand the pandemic from all its angles to be able to generate policymaking frameworks.  
444 This urges the need for a clear methodology that allows policymakers to decide which model is  
445 more applicable or adaptable for their context<sup>17</sup>, and underscores the necessity of enabling  
446 calculators to be adopted to local policies and behaviors beyond social distancing. Although gaps  
447 in the present data streams provide a challenge for the current epidemic forecasting, recent  
448 breakthroughs in this field afford the possibility for refining future predictive models<sup>29</sup>. Since

449 the most essential piece of the puzzle in forecasting is data or the quality of data source, we  
450 suggest that should the data be more accurate, one can provide pandemic forecasting with fewer  
451 constraints.

452

#### 453 **Acknowledgement**

454 None

455

#### 456 **Financial Support**

457 None

458

#### 459 **Conflict of interest**

460 No competing interest declared.

461

#### 462 **Author's Contribution**

463 AK and NM have contributed to the design and implementation of the research, to the analysis of  
464 the results, and the writing of the manuscript. EH and GE contributed to data collection. IE and  
465 HI conceived the study and were in charge of overall direction and planning. All authors  
466 discussed the results and contributed to the final manuscript.

467

#### 468 **Data Availability Statement**

469 Requests for access to the data that support this study should be made to the corresponding  
470 Authors: Dr. Hussain Isma'eel and Dr. Imad Elhajj.

471

472

#### 473 **References**

- 474 1. Li Yang, H., Yang Hsu, L., Ying Chia, P. & Lim, J. F. *The Novel Coronavirus (SARS-*  
475 *CoV-2) Epidemic*. (2020).
- 476 2. Wang, D. *et al.* Clinical Characteristics of 138 Hospitalized Patients with 2019 Novel  
477 Coronavirus-Infected Pneumonia in Wuhan, China. *JAMA - J. Am. Med. Assoc.* **323**,  
478 1061–1069 (2020).
- 479 3. WHO. WHO Coronavirus Disease (COVID-19) Dashboard. *WHO* (2020). Available at:  
480 <https://covid19.who.int/>. (Accessed: 28th May 2020)
- 481 4. Garcia Godoy, L. R. *et al.* Facial protection for healthcare workers during pandemics: a  
482 scoping review. *BMJ Glob. Heal.* **5**, e002553 (2020).
- 483 5. De Souza Noronha, K. V. M. *et al.* The COVID-19 pandemic in Brazil: Analysis of  
484 supply and demand of hospital and ICU beds and mechanical ventilators under different  
485 scenarios. *Cad. Saude Publica* **36**, 1–17 (2020).

- 486 6. OECD. COVID-19 crisis response in MENA countries. (2020). Available at:  
487 [https://www.oecd.org/coronavirus/policy-responses/covid-19-crisis-response-in-mena-  
countries-4b366396/](https://www.oecd.org/coronavirus/policy-responses/covid-19-crisis-response-in-mena-<br/>488 countries-4b366396/). (Accessed: 18th July 2020)
- 489 7. European Data Portal. Pressure on Healthcare Systems: Coping with Demand for ICU and  
490 Hospital Beds. (2020). Available at: [https://www.europeandataportal.eu/en/impact-  
studies/covid-19/pressure-healthcare-systems-coping-demand-icu-and-hospital-beds.](https://www.europeandataportal.eu/en/impact-<br/>491 studies/covid-19/pressure-healthcare-systems-coping-demand-icu-and-hospital-beds.<br/>492)  
(Accessed: 7th August 2020)
- 493 8. IHME COVID-19 health service utilization forecasting Team & Murray, C. J. Forecasting  
494 the impact of the first wave of the COVID-19 pandemic on hospital demand and deaths  
495 for the USA and European Economic Area countries. *medRxiv* (2020).
- 496 9. IHME COVID-19 health service utilization forecasting Team & Murray, C. J. Forecasting  
497 COVID-19 impact on hospital bed-days, ICU-days, ventilator-days and deaths by US state  
498 in the next 4 months. *medRxiv* **114**, 2020.03.27.20043752 (2020).
- 499 10. Al-Shammari, A. A. A. *et al.* Real-time tracking and forecasting of the of COVID-19  
500 outbreak in Kuwait: a mathematical modeling study. *medRxiv* 2020.05.03.20089771  
501 (2020). doi:10.1101/2020.05.03.20089771
- 502 11. AHA. COVID-19 Models : Forecasting the Pandemic ' s Spread. *Am. Hosp. Assoc.*  
503 (2020).
- 504 12. Altieri, N. *et al.* Curating a COVID-19 data repository and forecasting county-level death  
505 counts in the United States. (2020).
- 506 13. CDC. COVIDView: A Weekly Surveillance Summary of U.S. COVID-19 Activity | CDC.  
507 (2020). Available at: [https://www.cdc.gov/coronavirus/2019-ncov/covid-  
data/covidview/index.html](https://www.cdc.gov/coronavirus/2019-ncov/covid-<br/>508 data/covidview/index.html). (Accessed: 4th August 2020)
- 509 14. Miller, I. F., Becker, A. D., Grenfell, B. T. & Metcalf, C. J. E. Disease and healthcare  
510 burden of COVID-19 in the United States. *Nat. Med.* 1–6 (2020). doi:10.1038/s41591-  
511 020-0952-y
- 512 15. Gamio, L., Cai, W. & Hassan, A. Where the U.S. Stands Now on Coronavirus Testing -  
513 The New York Times. *The New York Times* (2020). Available at:  
514 <https://www.nytimes.com/interactive/2020/03/26/us/coronavirus-testing-states.html>.  
515 (Accessed: 6th August 2020)
- 516 16. Adolph, C. *et al.* *Pandemic Politics: Timing State-Level Social Distancing Responses to  
517 COVID-19 \* The authors thank.* (2020). doi:10.33774/APSA-2020-SF0PS
- 518 17. Nikolopoulos, K., Punia, S., Schäfers, A., Tsinopoulos, C. & Vasilakis, C. Forecasting and  
519 planning during a pandemic: COVID-19 growth rates, supply chain disruptions, and  
520 governmental decisions. *Eur. J. Oper. Res.* (2020). doi:10.1016/j.ejor.2020.08.001
- 521 18. Bertozzi, A. L., Franco, E., Mohler, G., Short, M. B. & Sledge, D. The challenges of  
522 modeling and forecasting the spread of COVID-19. 1–7 (2020).  
523 doi:10.1073/pnas.2006520117

- 524 19. Perc, M., Gorišek Miksić, N., Slavinec, M. & Stožer, A. Forecasting COVID-19. *Front.*  
525 *Phys.* **8**, 127 (2020).
- 526 20. Tabataba, F. S. *et al.* A framework for evaluating epidemic forecasts. *BMC Infect. Dis.* **17**,  
527 345 (2017).
- 528 21. Penn Medicine. The Model - CHIME. (2020). Available at: [https://code-for-](https://code-for-philly.gitbook.io/chime/what-is-chime/sir-modeling)  
529 [philly.gitbook.io/chime/what-is-chime/sir-modeling](https://code-for-philly.gitbook.io/chime/what-is-chime/sir-modeling). (Accessed: 13th July 2020)
- 530 22. Wolfram Math World. SIR Model. (2020). Available at:  
531 <https://mathworld.wolfram.com/SIRModel.html>. (Accessed: 28th May 2020)
- 532 23. Wolfram Math World. Kermack-McKendrick Model. (2020). Available at:  
533 <https://mathworld.wolfram.com/Kermack-McKendrickModel.html>. (Accessed: 28th May  
534 2020)
- 535 24. Penn Medicine. Model Parameters-CHIME. (2020). Available at: [https://code-for-](https://code-for-philly.gitbook.io/chime/what-is-chime/parameters)  
536 [philly.gitbook.io/chime/what-is-chime/parameters](https://code-for-philly.gitbook.io/chime/what-is-chime/parameters). (Accessed: 13th July 2020)
- 537 25. Henderson, M. & Carlson, E. Covid Act Now Model. *CovidActNow.com* (2020).
- 538 26. Luong, T. Introducing a PPE Calculator for use with CHIME. *Penn Medicine predictive*  
539 *healthcare* (2020). Available at:  
540 <http://predictivehealthcare.pennmedicine.org/2020/05/07/introducing-ppe-calculator.html>.  
541 (Accessed: 6th July 2020)
- 542 27. WHO. Essential resource planning. (2020). Available at:  
543 [https://www.who.int/emergencies/diseases/novel-coronavirus-2019/technical-](https://www.who.int/emergencies/diseases/novel-coronavirus-2019/technical-guidance/covid-19-critical-items)  
544 [guidance/covid-19-critical-items](https://www.who.int/emergencies/diseases/novel-coronavirus-2019/technical-guidance/covid-19-critical-items). (Accessed: 28th May 2020)
- 545 28. WHO. WHO COVID-19 Essential Supplies Forecasting Tool (COVID-ESFT) v1.1.  
546 (2020).
- 547 29. Desai, A. N. *et al.* Real-time Epidemic Forecasting: Challenges and Opportunities. *Heal.*  
548 *Secur.* **17**, 268–275 (2019).
- 549 30. CDC. Why CDC Supports Flu Forecasting. *Centers for Disease Control and Prevention*  
550 (2019). Available at: <https://www.cdc.gov/flu/weekly/flusight/why-flu-forecasting.htm>.  
551 (Accessed: 10th August 2020)
- 552 31. Stevens, H. Why outbreaks like coronavirus spread exponentially, and how to “flatten the  
553 curve” - Washington Post. *The Washington Post* (2020). Available at:  
554 <https://www.washingtonpost.com/graphics/2020/world/corona-simulator/>. (Accessed: 14th  
555 July 2020)
- 556 32. Kissler, S., Tedijanto, C., Lipsitch, M. & Grad, Y. Social distancing strategies for curbing  
557 the COVID-19 epidemic. *medRxiv* 2020.03.22.20041079 (2020).  
558 doi:10.1101/2020.03.22.20041079
- 559 33. Leung, K., Wu, J. T., Liu, D. & Leung, G. M. First-wave COVID-19 transmissibility and

- 560 severity in China outside Hubei after control measures, and second-wave scenario  
561 planning: a modelling impact assessment. *Lancet* **395**, 1382–1393 (2020).
- 562 34. Mumtaz, G. R. *et al.* Can the COVID-19 pandemic still be suppressed? Putting essential  
563 pieces together. *J. Glob. Heal. Reports* (2020). doi:10.29392/001c.12731
- 564 35. WHO. Shortage of personal protective equipment endangering health workers worldwide.  
565 (2020). Available at: [https://www.who.int/news-room/detail/03-03-2020-shortage-of-](https://www.who.int/news-room/detail/03-03-2020-shortage-of-personal-protective-equipment-endangering-health-workers-worldwide)  
566 [personal-protective-equipment-endangering-health-workers-worldwide](https://www.who.int/news-room/detail/03-03-2020-shortage-of-personal-protective-equipment-endangering-health-workers-worldwide). (Accessed: 14th  
567 July 2020)
- 568 36. Lodha, R. & Kabra, S. K. COVID-19: How to Prepare for the Pandemic? *Indian Journal*  
569 *of Pediatrics* **87**, 405–408 (2020).
- 570 37. Ferguson, N. M. *et al.* Report 9: Impact of of non-pharmaceutical interventions (NPIs) to  
571 reduce COVID-19 mortality and healthcare demand. *Imp. Coll. London* (2020).  
572 doi:10.25561/77482
- 573 38. Petropoulos, F., Makridakis, S., Assimakopoulos, V. & Nikolopoulos, K. ‘Horses for  
574 Courses’ in demand forecasting. *Eur. J. Oper. Res.* **237**, 152–163 (2014).
- 575



576

577 Table 1 Input parameters used for forecasting healthcare demand in Lebanon during the COVID-19  
 578 pandemic through CHIME Model/calculator, COVID-19 AUBMC, and WHO COVID-19 ESFT  
 579 calculators.

| Parameters                                                           | Value     | Reference/Source                                                                                                                                                                               |
|----------------------------------------------------------------------|-----------|------------------------------------------------------------------------------------------------------------------------------------------------------------------------------------------------|
| Lebanese population                                                  | 6,825,000 | WHO COVID-19 ESFT Calculator <sup>28</sup>                                                                                                                                                     |
| Currently hospitalized COVID-19 patients                             | 67        | MOPH report 14/5/2020                                                                                                                                                                          |
| Doubling time before social distancing (days)                        | 4 days    | calculated from the days following the first coronavirus case in Lebanon on February 21, 2020, <a href="https://www.moph.gov.lb/maps/covid19.php">https://www.moph.gov.lb/maps/covid19.php</a> |
| Hospitalization Percentage in Lebanon (%)                            | 20 %      | <a href="https://www.moph.gov.lb/en/Pages/2/24870/novel-coronavirus-2019-">https://www.moph.gov.lb/en/Pages/2/24870/novel-coronavirus-2019-</a>                                                |
| Average Days in ICU                                                  | 9         | MoPH report 27/3/2020                                                                                                                                                                          |
| ICU Percentage (%)                                                   | 5 %       | <a href="https://www.moph.gov.lb/en/Pages/2/24870/novel-coronavirus-2019-">https://www.moph.gov.lb/en/Pages/2/24870/novel-coronavirus-2019-</a>                                                |
| Mechanical Ventilators Percentage (%)                                | 3 %       | <a href="https://www.moph.gov.lb/en/Pages/2/24870/novel-coronavirus-2019-">https://www.moph.gov.lb/en/Pages/2/24870/novel-coronavirus-2019-</a>                                                |
| Hospital Length of Stay (days)                                       | 28        | <a href="http://gabgoh.github.io/COVID/index.html">http://gabgoh.github.io/COVID/index.html</a>                                                                                                |
| Hospital Market share (%)                                            | 100 %     | The percentage of patients in the region that are expected to come to a specific hospital (as opposed to other hospitals in the region) when they get sick <sup>21</sup> ..                    |
| Infectious days                                                      | 14        | CHIME Model <sup>24</sup>                                                                                                                                                                      |
| Number of Projected Days                                             | 200       | -                                                                                                                                                                                              |
| Currently Infected individuals (as of March 27 <sup>th</sup> , 2020) | 391       | MOPH report 27/3/2020                                                                                                                                                                          |

580

581

582  
 583 Table 2 The four different social distancing policy scenarios presumed, along with their subsequent  
 584 mitigation dates, to estimate the capacity of hospital beds, ICU beds, ventilators, and PPE demands during  
 585 the COVID-19 pandemic in Lebanon over 200 days.

| Social distancing policy (%) Scenario | Mitigation Date | Projection Time |
|---------------------------------------|-----------------|-----------------|
| 92% (WUHAN Style)                     | 05/14/2020      | 200 days        |
| 50%                                   | 04/27/2020      | 200 days        |
| 30%                                   | 05/01/2020      | 200 days        |
| 0 %                                   | 07/01/2020      | 200 days        |

586  
 587  
 588 Table 3 Data assumptions used to estimate peak daily hospital beds, ventilators, and the average daily  
 589 PPE demand using the COVID-19 AUBMC surge needs calculator.

|                                                                                 |                    |           |           |          |
|---------------------------------------------------------------------------------|--------------------|-----------|-----------|----------|
| <b>Time in ED (Hours)</b>                                                       | 14                 |           |           |          |
| <b>The average duration in ICU or inpatient (Days)</b>                          | 9                  |           |           |          |
| <b>Duration of Pandemic (Days)</b>                                              | 200                |           |           |          |
| <b>The average number of admitted patients / Social distancing (%) Scenario</b> | <b>Wuhan-Style</b> | <b>50</b> | <b>30</b> | <b>0</b> |
|                                                                                 | 6                  | 93        | 1204      | 44938    |
| <b>The average number of tested patients per day</b>                            | 2709               |           |           |          |

590  
 591  
 592 Table 4 The estimated total and available numbers of hospital beds, ICU beds, and ventilators for the  
 593 COVID-19 and non-COVID-19 patients in Lebanon according to the MoPH daily report on March 29,  
 594 2020

| Hospital Beds                         | Total Number | % of beds in use (non-COVID-19 Patients) |                                | Number Available (COVID-19 patients) |
|---------------------------------------|--------------|------------------------------------------|--------------------------------|--------------------------------------|
| <b>In-patient</b>                     | 15195        | 20                                       |                                | 9435                                 |
| <b>ICU</b>                            | 2308         | 32                                       |                                | 1569                                 |
| <b>Ventilators (Infant and adult)</b> | 1185         | <b>% Out of Service</b>                  | <b>% in Use (non-COVID-19)</b> | 687                                  |
|                                       |              | 2                                        | 40                             |                                      |

595  
 26

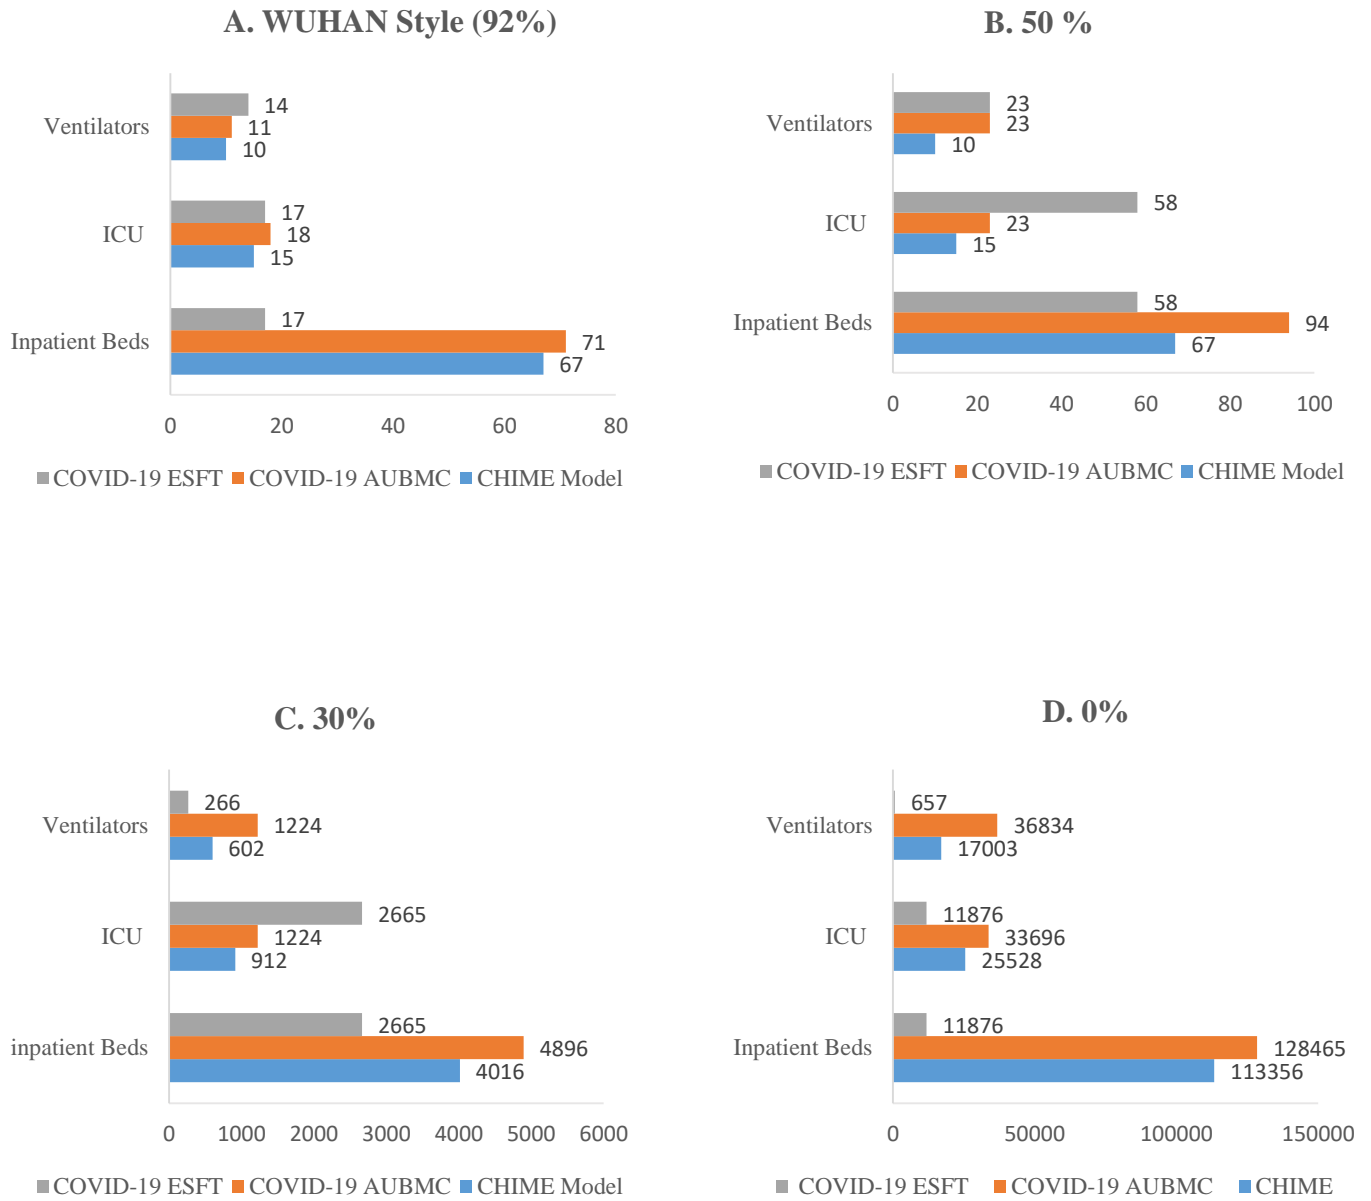

596

597 Figure 1 The forecasted peak of the daily inpatient beds, ICU beds, and ventilators by the three surge

598 calculator during the COVID-19 pandemic in Lebanon over 200 days assuming the four social distancing

599 policy scenarios (A, B, C, and D).

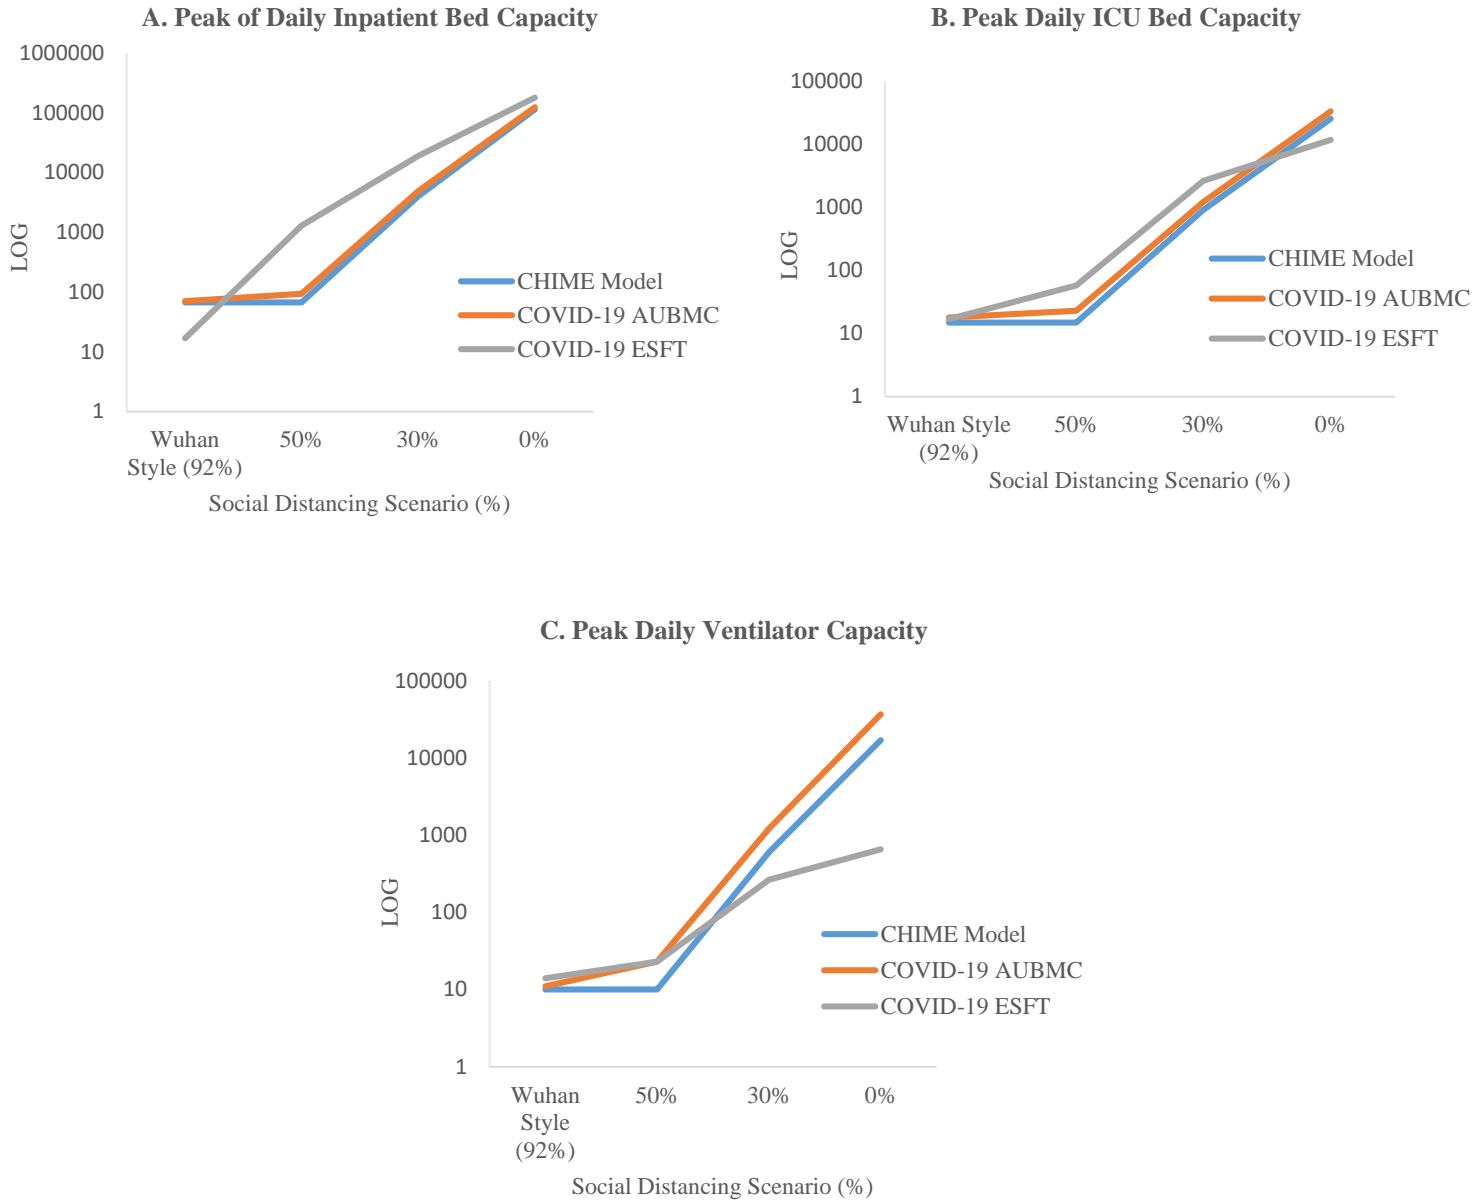

600

601 Figure 2 The variation in the forecasted peak capacity for inpatient beds (A), ICU beds (B), and  
602 ventilators (C) assuming the four social distancing policy using the three surge calculators over 200 days  
603 in Lebanon during the COVID-19 pandemic. All calculators show a significant increase in the number  
604 of occupied beds and ventilators upon relaxing social distancing measures.

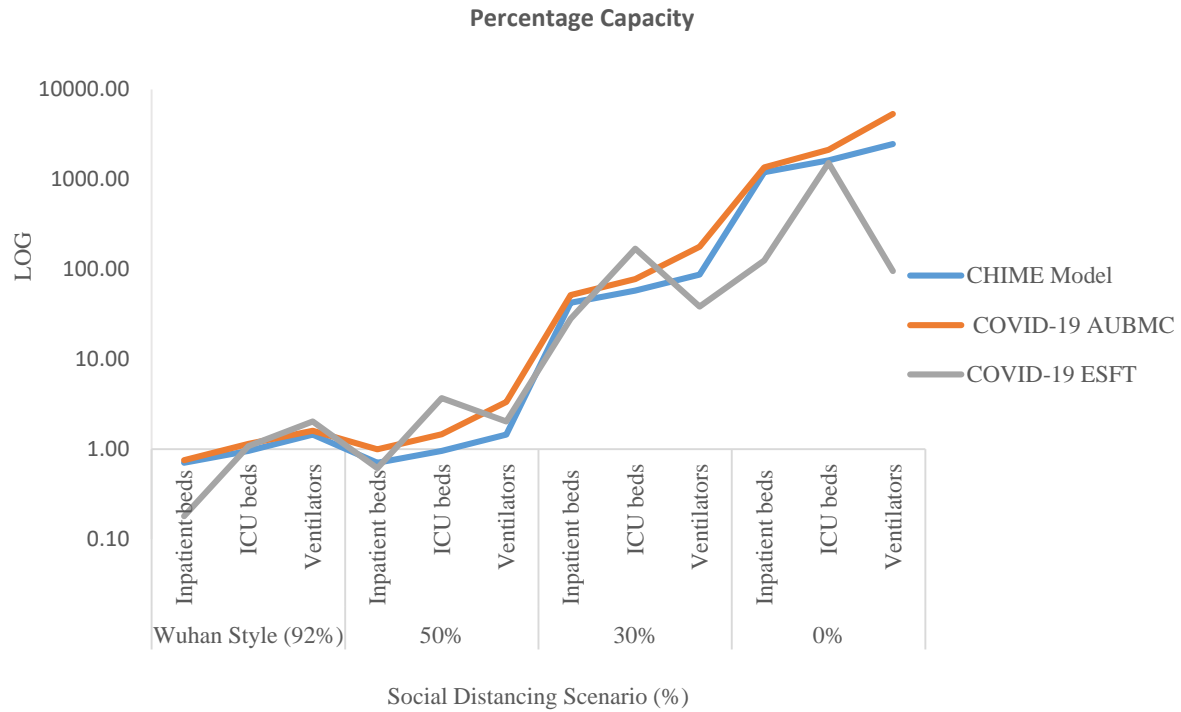

605  
606  
607  
608  
609  
610  
611

Figure 3 The variation in the projected percentage capacity of occupied hospital beds and ventilators upon changing the social distancing policy scenarios (%), using the three surge calculators during the COVID-19 pandemic in Lebanon. The three calculators forecast a sharp increase in the percentage of the occupied inpatient beds, ICU beds, and ventilators by the COVID-19 patients when social distancing measures are relaxed to 0%.

612  
613  
614  
615  
616  
617  
618

It is made available under a [CC-BY-NC-ND 4.0 International license](https://creativecommons.org/licenses/by-nc-nd/4.0/).

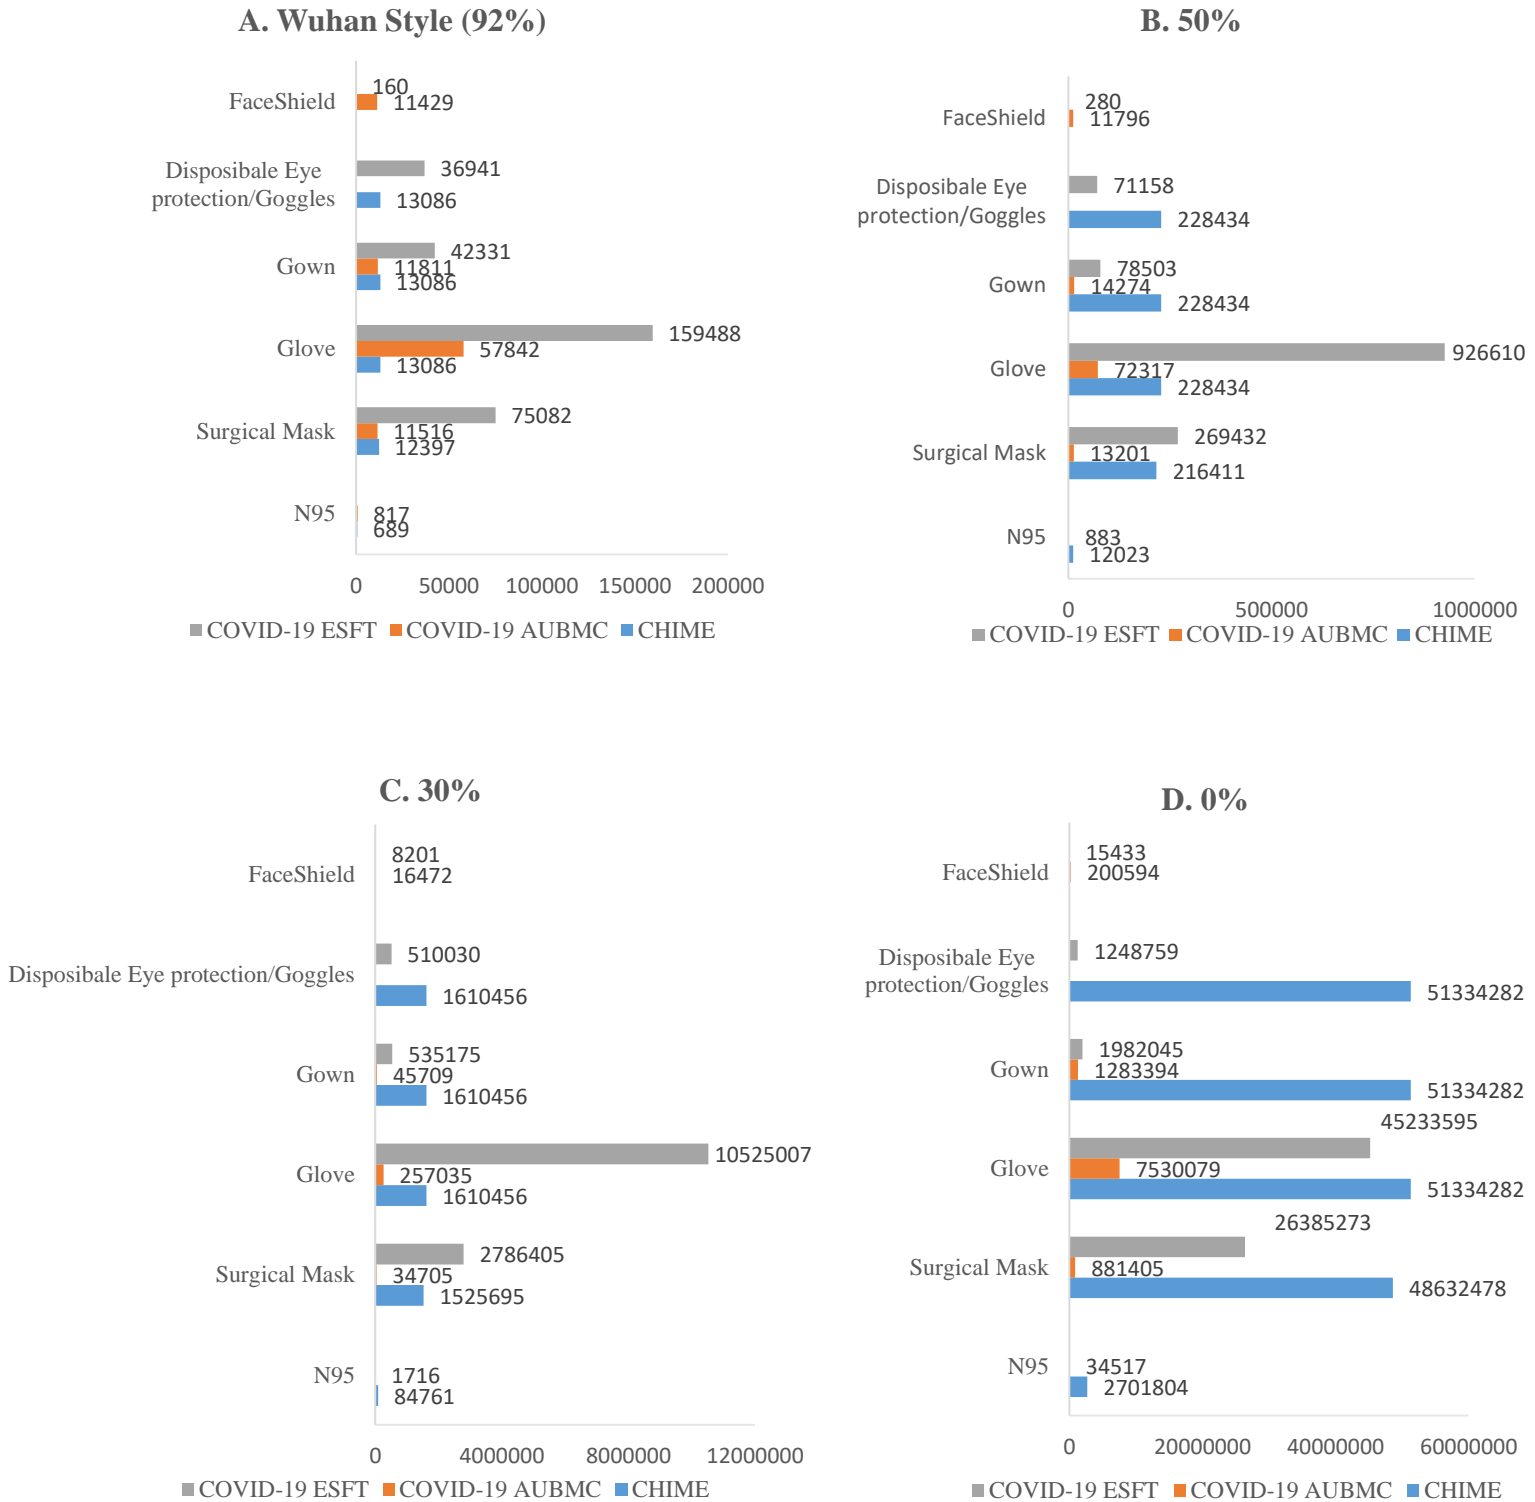

619 Figure 4 Comparing the forecasted average daily demand for all PPE types by the three surge calculators

620 during the COVID-19 pandemic in Lebanon for 200 days, assuming the four social distancing policy

621 scenarios (A, B, C, and D). The surge calculators forecast a significant spike in the average daily PPE  
622 demand as social distancing measures are relaxed.

623

624

625

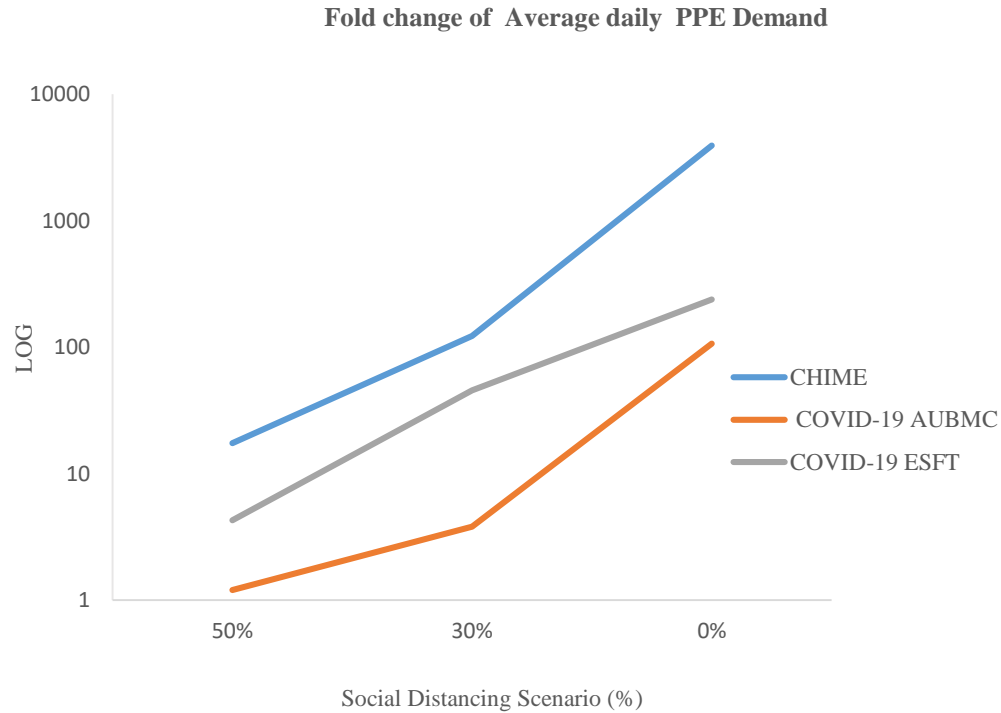

626

627 Figure 5 The fold change in the forecasted average daily demand for all PPE types by the three surge  
628 calculators at the 50%, 30%, and 0% social distancing scenarios compared to the Wuhan Style scenario  
629 (92%). All surge calculators used herein show a sharp increase and an excess in the average daily PPE  
630 demand upon relaxing social distancing policy measures during the COVID-19 pandemic in Lebanon up  
631 to 200 days.

632
